# Supplementary material for: New concept in neurovascular navigation: technical description and preclinical experience with the Bendit 17 and Bendit 21 microcatheters in a rabbit aneurysm model
Source: PubMed Central journal article supplement — J Neurointerv Surg. 2022 Mar 15;15(2):172–5. doi: 10.1136/neurintsurg-2022-018644 (PMC9872234; doi:10.1136/neurintsurg-2022-018644), 2022-03-15
Supplement: neurintsurg-2022-018644supp001.pdf [file neurintsurg-2022-018644supp001.pdf]

**SUPPLEMENTAL MATERIAL**

**New Concept in Neurovascular Navigation: Technical Description and Preclinical  
Experience with the Bendit 17 and Bendit 21 Microcatheters in a Rabbit Aneurysm Model**

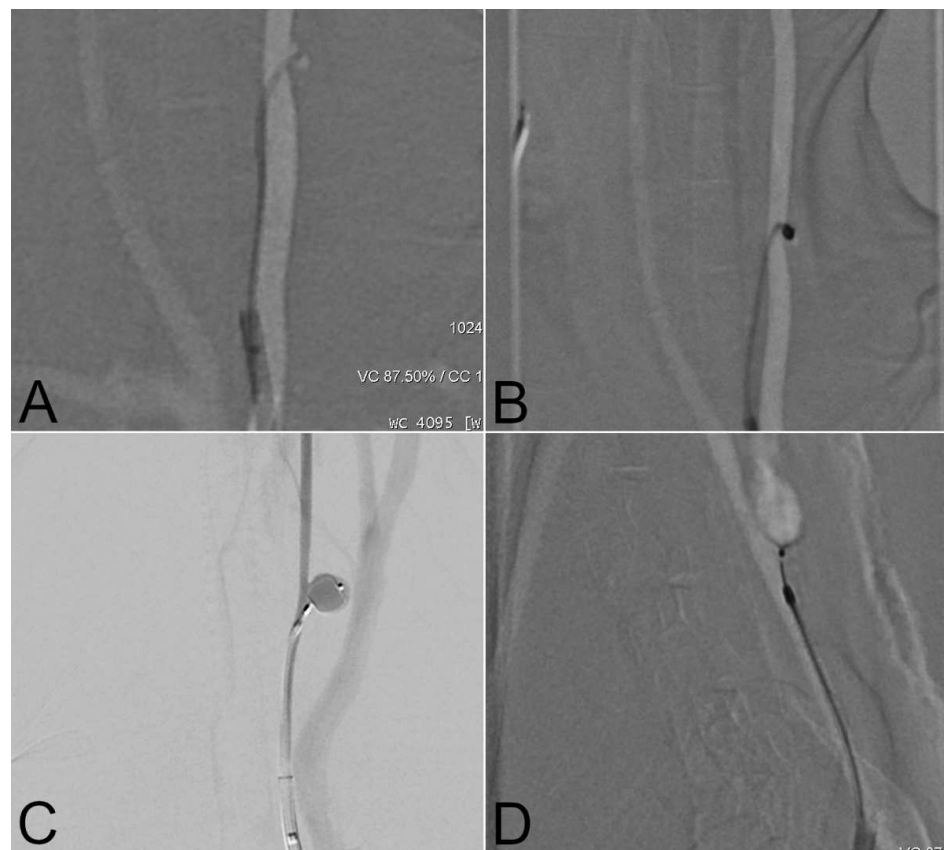

**Supplemental Figure 1: Using the Bendit to deploy intrasaccular devices into side-wall aneurysms.** A) Three investigators were able to catheterize this small (under 2 mm) side-wall aneurysm without a guidewire, Bendit 17. B) Bendit 17 used to add coils to a side-wall aneurysm. C) The Bendit 21 used to deploy the WEB 17 (Microvention) intrasaccular device into a side-wall aneurysm. D) The Bendit 21 used to deploy the Contour Neurovascular System (Cerus Endovascular) into a side-wall aneurysm.

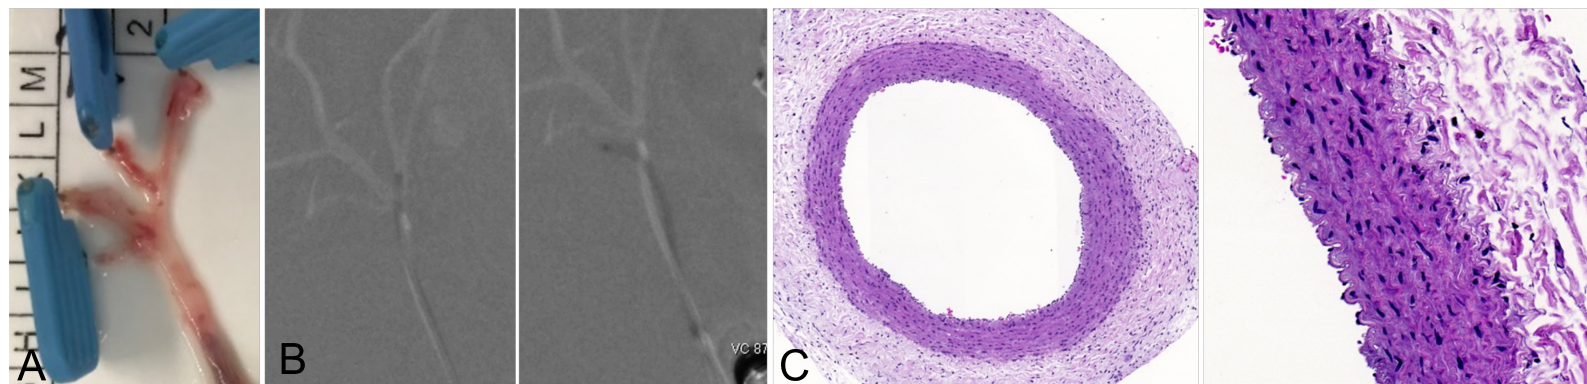

**Supplemental Figure 2: Histology.** A) Photograph of an explanted vessel fixed on a KliniTray™, depicting the carotid bifurcation after circumferential and linear advancement of the catheter. B) Digital subtraction angiography of a vessel *in vivo* during manipulation with the Bendit 17 microcatheter without a guidewire. C) Acute specimen hematoxylin and eosin (H&E) stain of a manipulated vessel section (part of Good Laboratory Practice [GLP] study), showing no evidence of injury.
